# Supplementary material for: Maternal immune activation results in complex microglial transcriptome signature in the adult offspring that is reversed by minocycline treatment
Source: PubMed Central journal article supplement (PMC5534948; doi:10.1038/tp.2017.80), 2017-05-09
Supplement: tp201780x3.pdf [file tp201780x3.pdf]

**Sfpi1** 5' → 3'  
Forward ATGTTACAGGCGTGCAAAATGG  
Reverse TGATCGCTATGGCTTTCTCCA

**Irf8**  
Forward CGGGGCTGATCTGGGAAAAT  
Reverse CACAGCGTAACCTCGTCTTC

**Tgf1b**  
Forward AGGGCTACCATGCCAACTTC  
Reverse TGGTTGTAGAGGGCAAGGAC

**Jun**  
Forward CCTTCTACGACGATGCCCTC  
Reverse GGTTC AAGGTCATGCTCTGTTT

**Ptgs2**  
Forward ATCCTTGCTGTTCCAATCCA  
Reverse ATCCAGTCCGGGTACAGTCA

**Vim**  
Forward TTCTCTGGCAGGTCTTGACC  
Reverse GCTTGAAAACGTCCACATCG

**Cx3cr1**  
Forward CCTGTTATTTGGGCGACATT  
Reverse ACCAGACCGAACGTGAAGAC
